# Supplementary material
Source: Research Square preprint supplement (doi:10.21203/rs.3.rs-9246639/v1)
Supplement: Supplementary file 1 [file 6ccbe0243d4ead23f10a3947.docx]

# Table S1. Distribution of Reported Mental Health Cases by Municipality, Parsa District, Nepal

| Municipality | Reported Mental Health Cases (n) |
| --- | --- |
| Rural municipalities (combined, n=9) | 3 |
| Chhipaharmai | 19 |
| Sakhuwa Prasauni | 77 |
| Parsagadhi | 131 |
| Pokhariya | 155 |
| Birgunj Metropolitan City | 14,472 |
| Total | 14,814 |

Interpretation:
This distribution demonstrates a strong hospital-centric reporting pattern, with the overwhelming majority of mental health cases reported from Birgunj Metropolitan City. In contrast, there is very low reporting from primary health care centers in rural municipalities, indicating potential underreporting and weak integration of mental health services at the primary care level.
